# Supplementary material
Source: publisher site journal article supplement (https://www.spandidos-publications.com/4278/downloadSupplementary)

Figure S1. Chr5:143 402,505-143405,805 [UCSC Genome Browser on Human Dec. 2013 (GRCh38/hg38) Assembly]. Image taken from UCSC Genome Browser of NR3C1 alternative exon 1 (black horizontal boxes), with four significant sites highlighted as pink vertical lines. Blue/purple waves represents layered H3K27Ac mark. Conservation in 30 mammals is presented in the green histogram. Chr, chromosome; UCSC, University of California, Santa Cruz; GRCh38/hg38, Human Genome Reference Consortium, human genome build 38, also known as human genome 38; NR3C1, nuclear receptor subfamily 3 group C member 1; cons, degree of conservation; GENCODE, Genome part of ENCODE (Encyclopaedia of DNA Elements) project of the National Human Genome Research Institute (NHGRI), an National Institutes of Health, (Bethesda, MD, USA); NCBI, National Centre for Biotechnology Information; OMIM, Online Mendelian Inheritance in Man; dbSNP, database of SNPs (Single Nucleotide Polymorphisms).

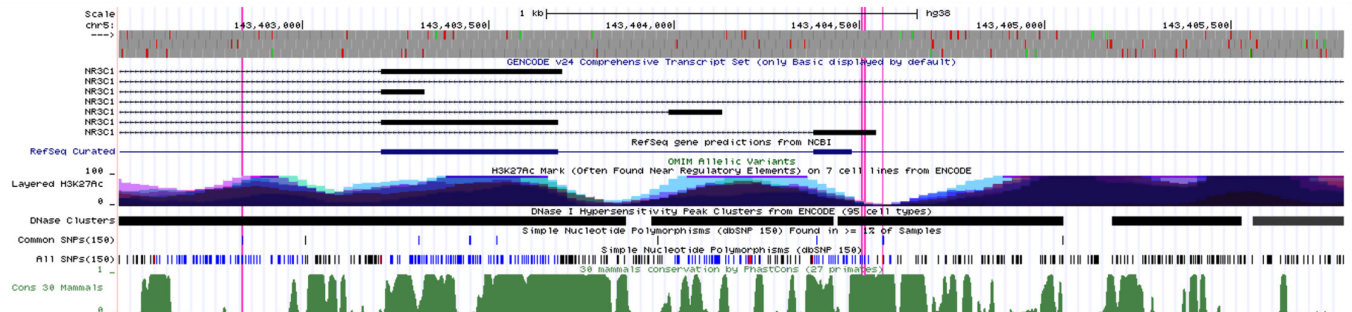

Supplement: Supplementary file 1 [file downloadSupplementary]
